# Supplementary material for: Vitamin D and Its Analogues Decrease Amyloid-β (Aβ) Formation and Increase Aβ-Degradation
Source: PubMed Central journal article supplement (PMC5751363; doi:10.3390/ijms18122764), 2017-12-19

**Figure S1:**

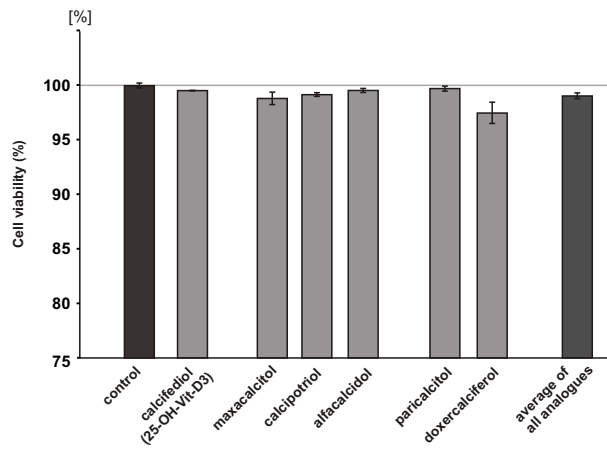

|                                            |   |   |   |   |   |   |
|--------------------------------------------|---|---|---|---|---|---|
| D <sub>3</sub> or D <sub>3</sub> analogues | + | + | + | + | - | - |
| D <sub>2</sub> analogues                   | - | - | - | - | + | + |
| 25-hydroxylated                            | + | + | - | - | + | - |

**Figure S2:**

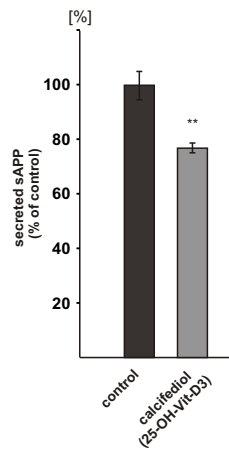

Supplement: ijms-18-02764-s001.pdf [file ijms-18-02764-s001.pdf]
